# Supplementary material
Source: PubMed Central journal article supplement (PMC5036357)
Supplement: 10.1194_D070565_jlr.D070565-1.pdf [file 10.1194_D070565_jlr.D070565-1.pdf]

## Molecular structures of reagents

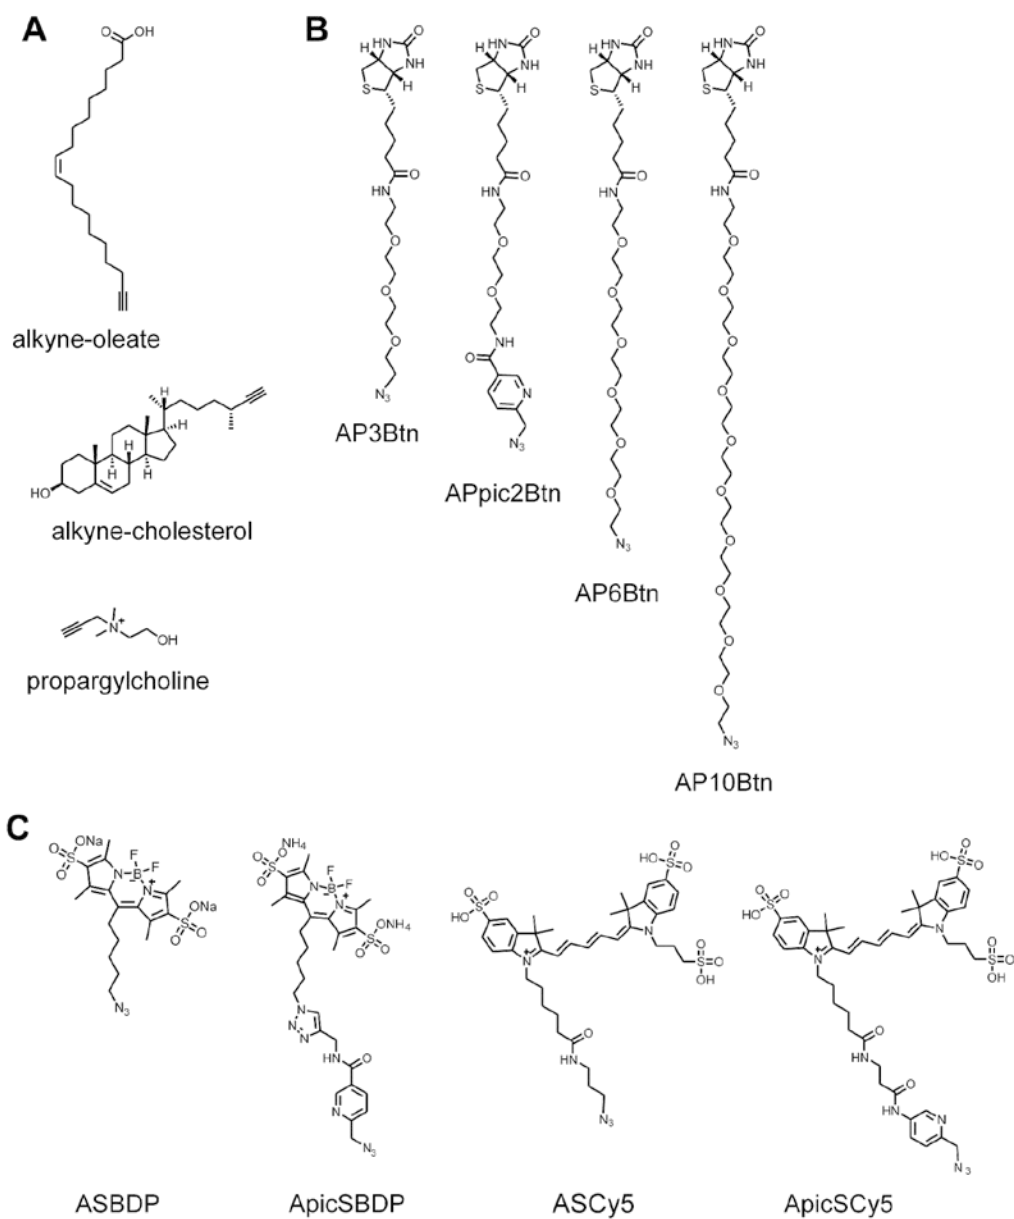

Supplemental Figure S1: Alkyne lipids (A), biotin-based azide detection reagents (B), and fluorescent azide detection reagents (C) used in this study.
